# Supplementary material
Source: MDPI journal article supplement (https://www.mdpi.com/2076-3298/11/3/49)
Supplement: s1 [file s1]

## Supplementary information

### S1 - Ashes description

SSA was produced as part of the ReNu2Farm project using the AshDec® process. The process aims to remove heavy metals from the sewage sludge ash and the conversion of non-plant available phosphate to plant-available calcium (Ca)-sodium (Na)/potassium (K) phosphates (Figure 1). The ash is thermally treated at high temperatures (~900°C) in a rotary kiln. Total P = 53-55 g/kg, K = 95-134 g/kg, S = 26-31 g/kg, Ca = 153-166 g/kg, Mg = 29-35 g/kg, Fe = 3.5-4.6 g/kg, Al = 4.9-7.5 g/kg (for more details, see [72]).

PLA was produced from 600 poultry manures through incineration at up to 1000°C. The obtained ashes are used for export to EU countries and the UK. PLA has a high dry matter content, pH-water of 12-13 and a low electrical conductivity, is P-rich with considerable amounts of K, S, Ca and Mg, but negligible N content. Heavy metals are present below prescribed legal limits (EU FertilisingProduct Regulation 2019/1009). Total P = 65-84 g/kg, K = 10-13 g/kg, S = 30-50 g/kg, Ca = 76-103 g/kg, Mg = 15 g/kg, Fe = 43-60 g/kg, Al = 4.5-53 g/kg (for more details, see [72]).

## Supplementary Tables

*Table S1 Mean AMF colonization of the L. perenne roots after cultivation in microcosms for 54 days in soil amended with P fertilizers SP, PLA and SSA a year prior to the experiment, arbuscular (AC), vesicular (VC) and hyphal (HC) colonization were recorded via microscopic investigation at 600x magnification after root staining with trypan blue [30], 100 observations per sample,  $\pm$  represents standard error,  $n=6$ . Letter “a” within a column indicates that there is no statistically significant difference between the treatments (ANOVA with Tukey post-hoc test,  $P \leq 0.05$ ).*

| Treatment | AC (%)                        | VC (%)                       | HC (%)                       |
|-----------|-------------------------------|------------------------------|------------------------------|
| SP0       | 62.50 <sup>a</sup> $\pm 6.4$  | 67.67 <sup>a</sup> $\pm 4.5$ | 98.67 <sup>a</sup> $\pm 1.1$ |
| SP60      | 43.83 <sup>a</sup> $\pm 6.4$  | 61.83 <sup>a</sup> $\pm 5.5$ | 90.33 <sup>a</sup> $\pm 5.3$ |
| PLA60     | 62.83 <sup>a</sup> $\pm 3.2$  | 76.00 <sup>a</sup> $\pm 3.9$ | 99.83 <sup>a</sup> $\pm 0.2$ |
| SSA60     | 67.00 <sup>a</sup> $\pm 11.1$ | 53.67 <sup>a</sup> $\pm 9.7$ | 98.00 <sup>a</sup> $\pm 0.6$ |

*Table S2 Alpha diversity measures of 16S rRNA amplicon sequencing results of the microcosm trial, significance determined via Kruskal-Wallis test and Wilcoxon post-hoc analysis and Benjamini-Hochberg correction, different letters within a column indicate statistically significant difference,  $n=6$ .*

| Treatment | Observed Features             | Chao1                         | ACE                           | Shannon                       | Simpson                          |
|-----------|-------------------------------|-------------------------------|-------------------------------|-------------------------------|----------------------------------|
| SP0       | 676.0 <sup>a</sup> $\pm 76.5$ | 676.0 <sup>a</sup> $\pm 76.5$ | 676.1 <sup>a</sup> $\pm 76.5$ | 6.15 <sup>a</sup> $\pm 0.094$ | 0.9965 <sup>a</sup> $\pm 0.0002$ |
| SP60      | 527.5 <sup>a</sup> $\pm 73.1$ | 527.5 <sup>a</sup> $\pm 73.1$ | 527.5 <sup>a</sup> $\pm 73.1$ | 5.87 <sup>a</sup> $\pm 0.170$ | 0.9954 <sup>a</sup> $\pm 0.0007$ |
| PLA60     | 611.2 <sup>a</sup> $\pm 38.8$ | 611.2 <sup>a</sup> $\pm 38.8$ | 611.2 <sup>a</sup> $\pm 38.8$ | 6.06 <sup>a</sup> $\pm 0.060$ | 0.9962 <sup>a</sup> $\pm 0.0001$ |
| SSA60     | 590.0 <sup>a</sup> $\pm 21.4$ | 590.0 <sup>a</sup> $\pm 21.4$ | 590.0 <sup>a</sup> $\pm 21.4$ | 6.04 <sup>a</sup> $\pm 0.033$ | 0.9962 <sup>a</sup> $\pm 0.0001$ |

*Table S3. Alpha diversity measures of phoD functional gene sequencing results of the microcosm trial, significance determined via Kruskal-Wallis test and Wilcoxon post-hoc analysis and Benjamini-Hochberg correction, different letters within a column indicate statistically significant difference,  $n=6$ .*

| Treatment | Observed Features                | Chao1                            | ACE                              | Shannon                         | Simpson                          |
|-----------|----------------------------------|----------------------------------|----------------------------------|---------------------------------|----------------------------------|
| SP0       | 3071.2 <sup>a</sup> $\pm 82.80$  | 3648.3 <sup>a</sup> $\pm 54.14$  | 3704.8 <sup>a</sup> $\pm 44.18$  | 5.864 <sup>a</sup> $\pm 0.0386$ | 0.9888 <sup>a</sup> $\pm 0.0005$ |
| SP60      | 3011.8 <sup>a</sup> $\pm 99.07$  | 3710.7 <sup>a</sup> $\pm 62.39$  | 3751.4 <sup>a</sup> $\pm 53.65$  | 5.893 <sup>a</sup> $\pm 0.0257$ | 0.9892 <sup>a</sup> $\pm 0.0002$ |
| PLA60     | 2769.2 <sup>a</sup> $\pm 151.51$ | 3499.3 <sup>a</sup> $\pm 135.04$ | 3573.2 <sup>a</sup> $\pm 120.18$ | 5.805 <sup>a</sup> $\pm 0.0223$ | 0.9869 <sup>b</sup> $\pm 0.0003$ |
| SSA60     | 3235.5 <sup>a</sup> $\pm 61.91$  | 3755.4 <sup>a</sup> $\pm 57.27$  | 3814.4 <sup>a</sup> $\pm 56.24$  | 5.891 <sup>a</sup> $\pm 0.0229$ | 0.9883 <sup>a</sup> $\pm 0.0003$ |

## Supplementary Figures

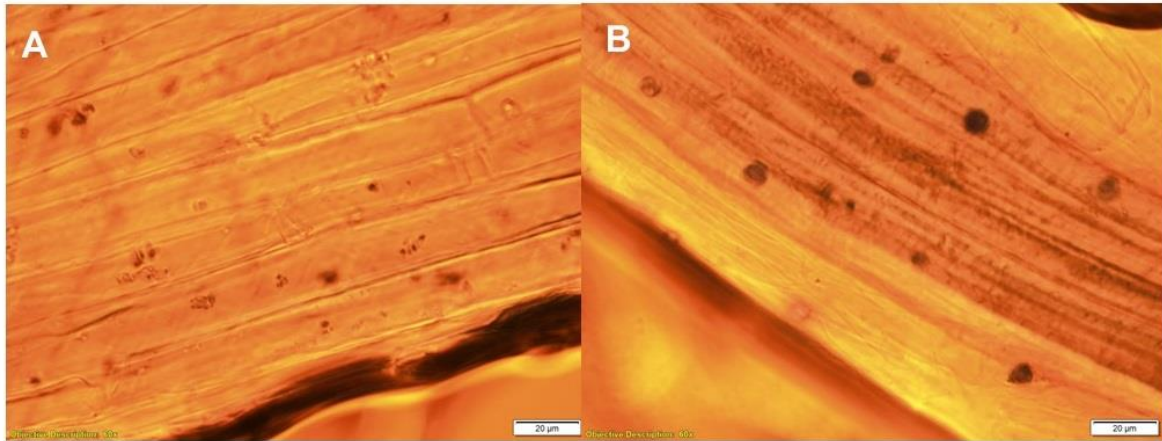

*Figure S1. Example of arbuscules (A) and vesicles (B) in L. perenne roots after cultivation in soils fertilized with ashes, visualised at 600X magnification (BX60, Olympus, Tokyo, Japan)*

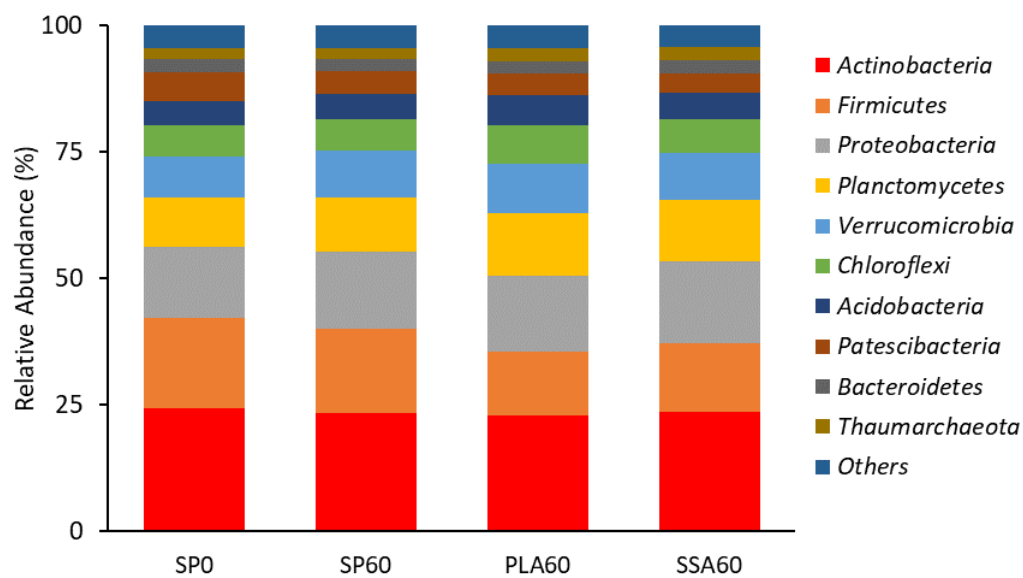

Figure S2. Mean relative abundance of the top 10 abundant phyla obtained from 16S rRNA amplicon sequencing of the microcosm trial, all other genera collapsed in “others”,  $n=6$ .

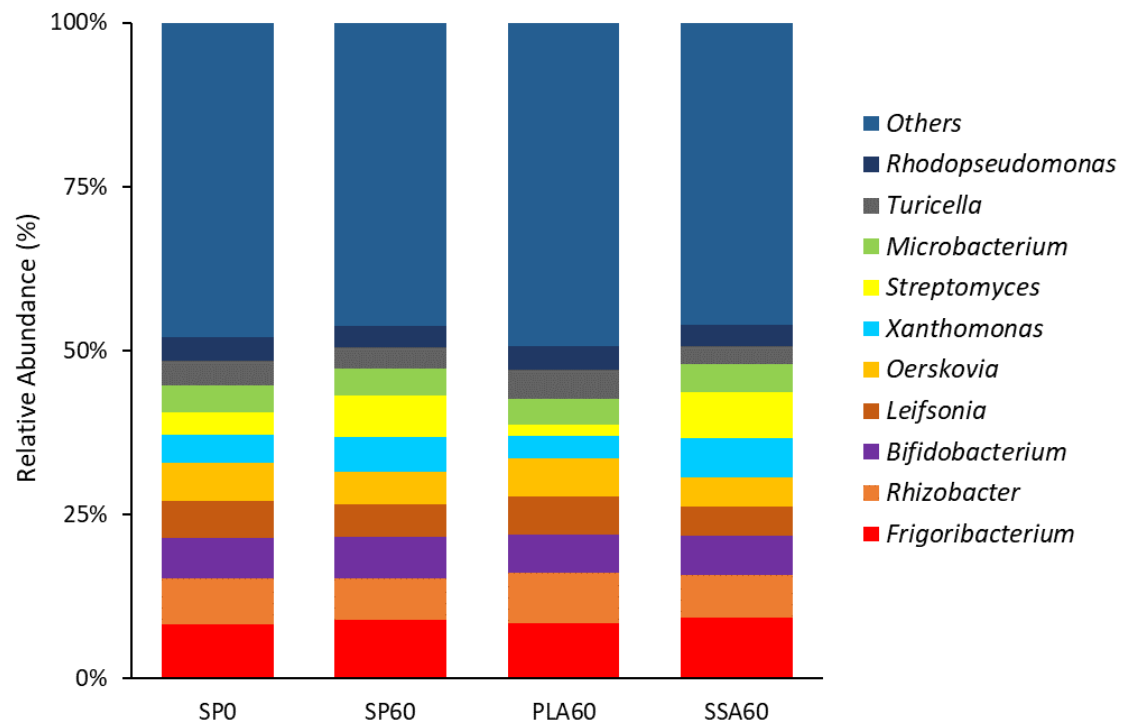

Figure S3. Mean relative abundance of the top 10 abundant genera obtained from *phoD* amplicon sequencing of the microcosm trial, all other genera collapsed in “others”,  $n=6$ .
